# Supplementary material for: Novel mycophenolic acid precursor-based fluorescent probe for intracellular H2O2 detection in living cells and Daphnia magna and Zebrafish model systems
Source: Royal Society of Chemistry journal article supplement (doi:10.1039/d4an00742e), 2024-01-01
Supplement: d4an00742e1.pdf [file d4an00742e1.pdf]

## Supporting Information

### **Novel mycophenolic acid precursor–based fluorescent probe for intracellular H<sub>2</sub>O<sub>2</sub> detection in living cells and *Daphnia magna* and Zebrafish model systems.**

Jongkeol An<sup>a</sup>, Sujeong Park<sup>b</sup>, Neha Jain<sup>a</sup>, Youngsam Kim<sup>c,d,\*</sup>, Satish B. Nimse<sup>b,\*</sup>, David G. Churchill<sup>a,c,\*</sup>

<sup>a</sup> *Department of Chemistry, Molecular Logic Gate Laboratory, Korea Advanced Institute of Science and Technology (KAIST), Daejeon, 34141, Republic of Korea*

<sup>b</sup> *Institute of Applied Chemistry and Department of Chemistry, Hallym University, Chuncheon, 24252, Republic of Korea*

<sup>c</sup> *Environmental Safety Group, KIST Europe Forschungsgesellschaft mbH, 66123 Saarbrücken, Germany*

<sup>d</sup> *Division of Energy and Environment Technology, University of Science and Technology, Daejeon 34141, Republic of Korea*

<sup>e</sup> *KAIST Institute for Health Science and Technology (KIHST) (Therapeutic Bioengineering Section), Daejeon 34141, Republic of Korea*

## Table of Contents

|                                                                                                              |              |
|--------------------------------------------------------------------------------------------------------------|--------------|
| <b>Table S1. Comparison of previous reported probes .....</b>                                                | <b>2</b>     |
| <b>Fig. S1-S3. <sup>1</sup>H NMR spectra and other 2D spectra of LBM .....</b>                               | <b>3-5</b>   |
| <b>Fig. S4. HR-MS spectra of LBM.....</b>                                                                    | <b>6</b>     |
| <b>Scheme. S1. Cleavage reaction between LBM and H<sub>2</sub>O<sub>2</sub> .....</b>                        | <b>6</b>     |
| <b>Fig. S5a-b. Absorption and fluorescence spectra of the LBM with H<sub>2</sub>O<sub>2</sub> .....</b>      | <b>7</b>     |
| <b>Fig. S6-S8. <sup>1</sup>H NMR spectra and other 2D spectra of LBM .....</b>                               | <b>8-9</b>   |
| <b>Fig. S9. HR-MS spectra of LOH .....</b>                                                                   | <b>11</b>    |
| <b>Fig. S10-S12. Proposed sensing mechanism for the detection of H<sub>2</sub>O<sub>2</sub> by LBM .....</b> | <b>11-13</b> |
| <b>Fig. S13. LOD (Limit of detection) photophysical data.....</b>                                            | <b>13</b>    |
| <b>Fig. S14. Co-localization of Lyso-tracker Dye and LBM .....</b>                                           | <b>14</b>    |
| <b>Fig. S15. Immobilization of daphnids .....</b>                                                            | <b>14</b>    |

**Table S1.** Comparison of related and previously reported fluorescent probes for the detection of H<sub>2</sub>O<sub>2</sub>.

| No. and Ref.     | Probe structure                                                                     | Photo mechanism | Reaction time | Detection limit |
|------------------|-------------------------------------------------------------------------------------|-----------------|---------------|-----------------|
| 1. <sup>1</sup>  | 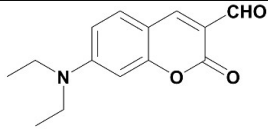   | TICT            | 20 min        | 31 nM           |
| 2. <sup>2</sup>  |    | ESIPT           | 45 min        | 109 nM          |
| 3. <sup>3</sup>  |    | PET             | 20 min        | 31 nM           |
| 4. <sup>4</sup>  |  | ICT             | 30 min        | 0.85 μM         |
| 5. <sup>5</sup>  |  | ICT             | 40 min        | 91 nM           |
| 6. <sup>6</sup>  |  | ESIPT           | 30 min        | 84 nM           |
| <b>This work</b> |  | ESIPT           | 45 min        | 13 nM           |

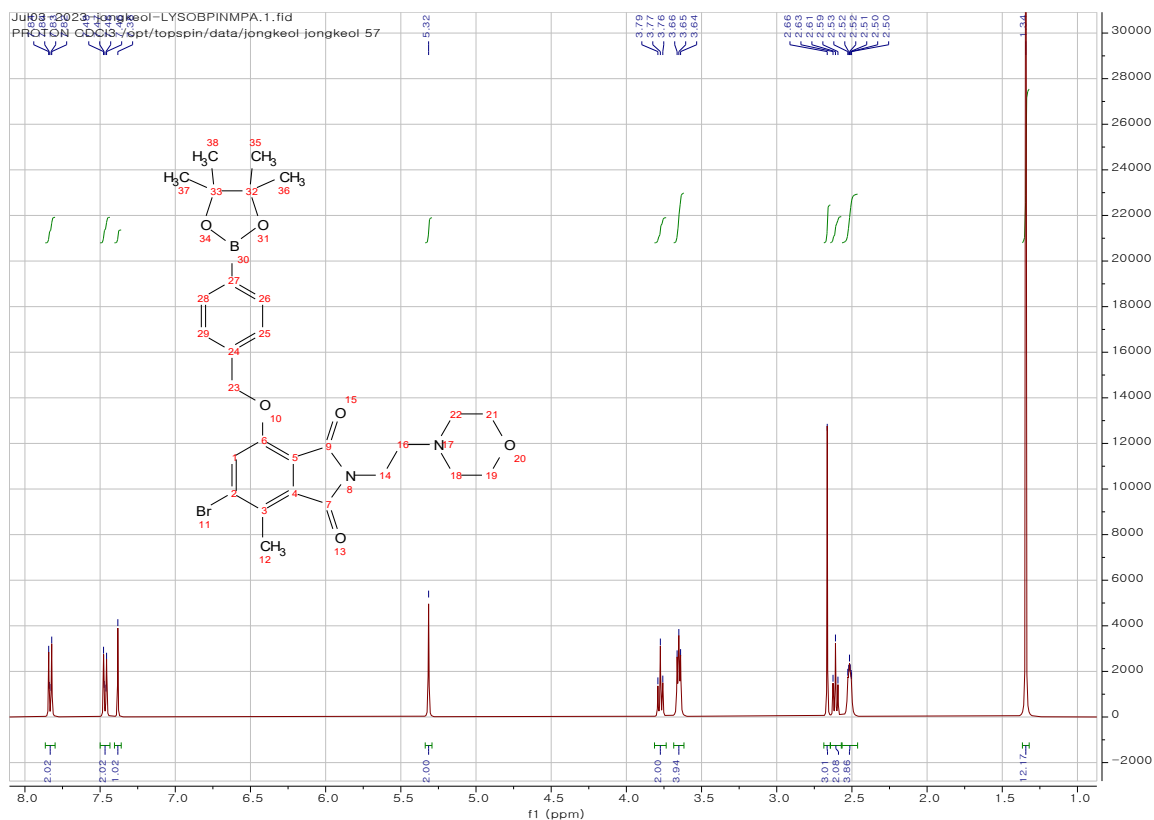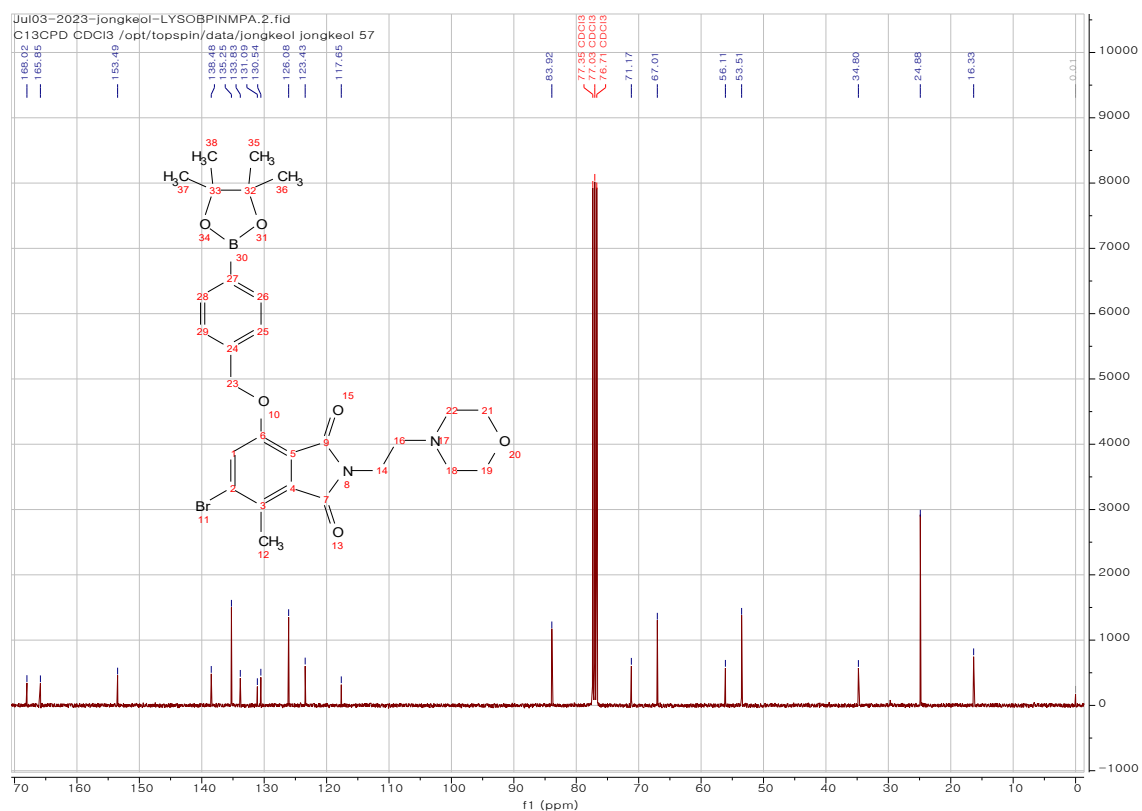

Fig. S1. <sup>1</sup>H NMR (top) and <sup>13</sup>C NMR (bottom) spectra of LBM.

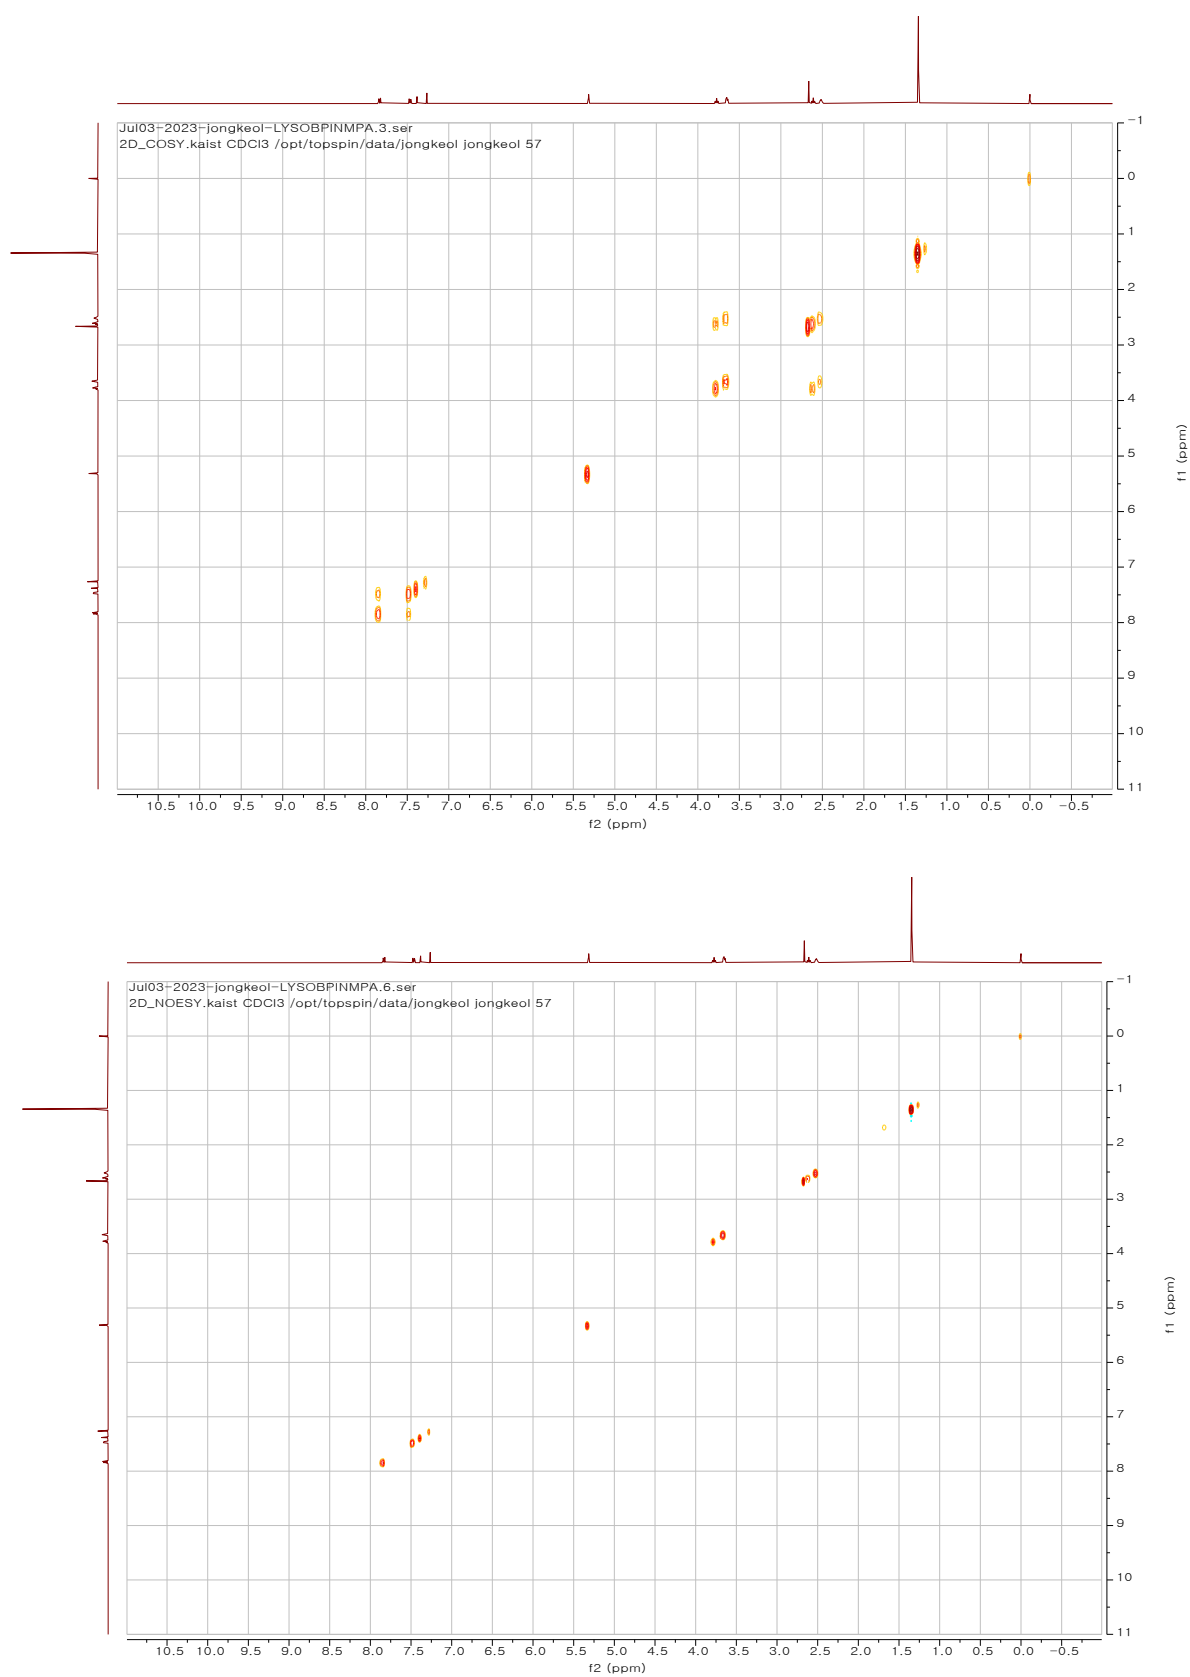

**Fig S2.**  $^1\text{H}$ - $^1\text{H}$  COSY (top) and  $^1\text{H}$ - $^1\text{H}$  NOESY (bottom) NMR spectra of **LBM**.

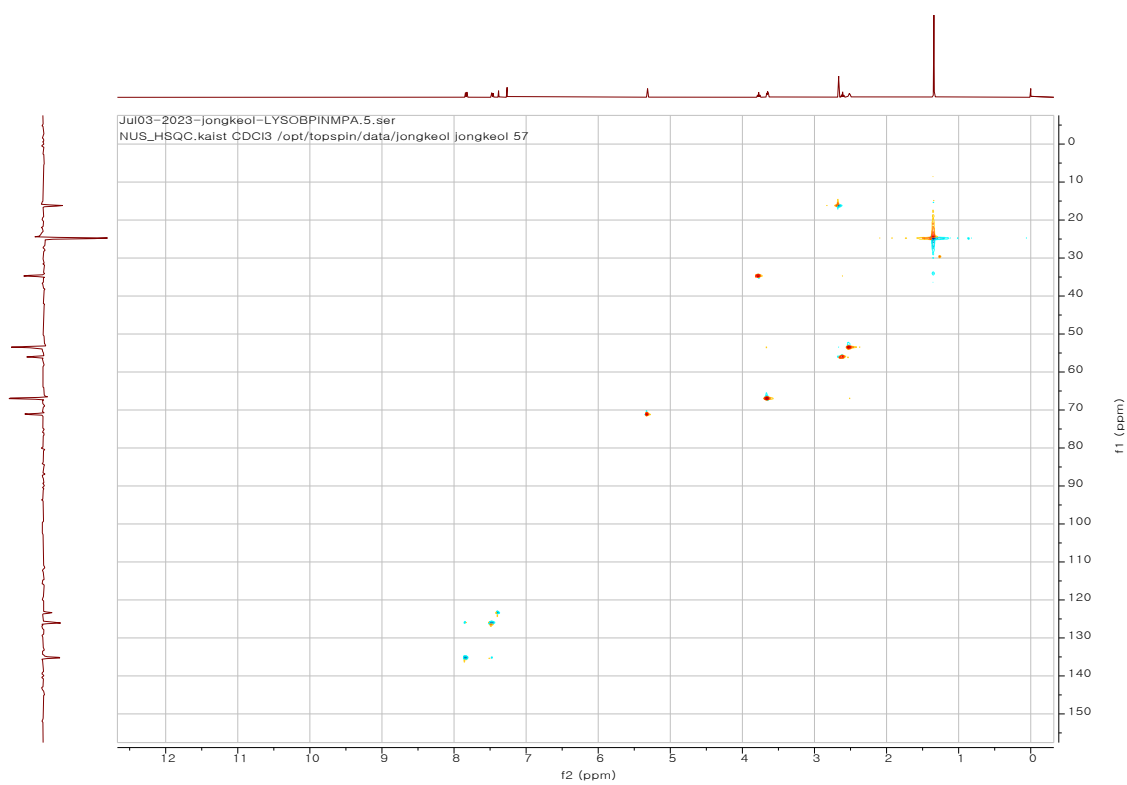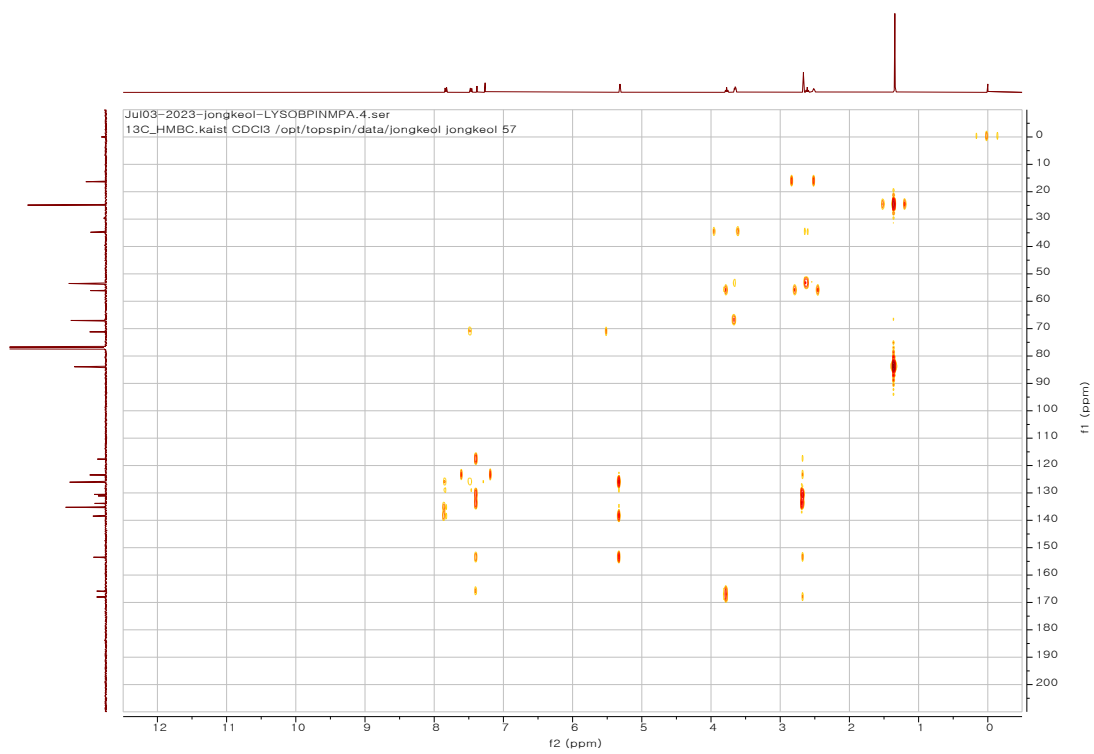

**Fig S3.**  $^1\text{H}$ - $^{13}\text{C}$  HSQC (top) and  $^1\text{H}$ - $^{13}\text{C}$  HMBC (bottom) NMR spectra of **LBM**.

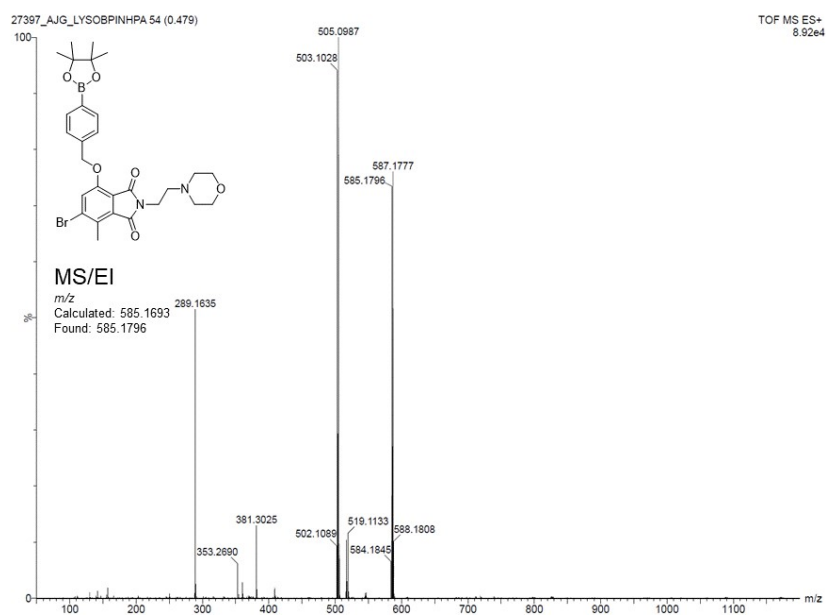

**Fig. S4.** HR-MS spectra of **LBM**

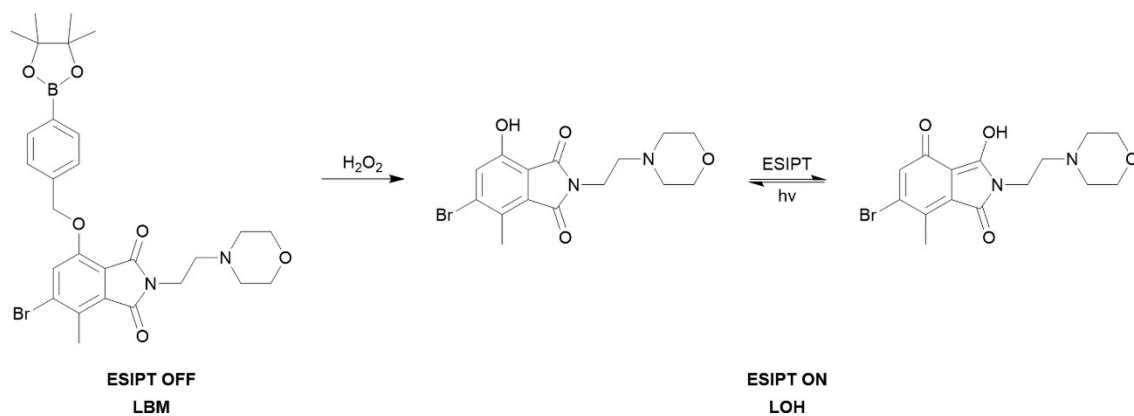

**Scheme S1.** A simplified illustration of the cleavage reaction occurring between **LBM** (Probe) and  $\text{H}_2\text{O}_2$  followed by the ensuing tautomerization phenomenon.

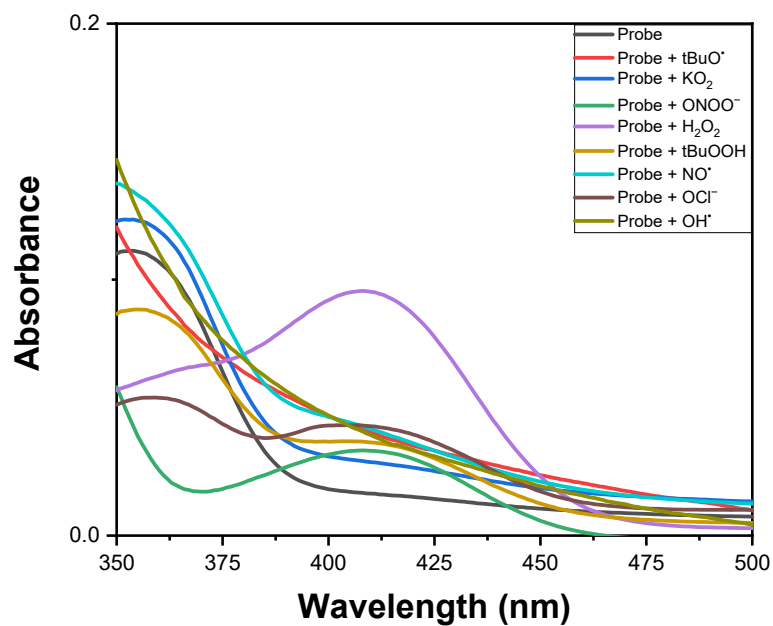

**Fig. S5a.** Absorption spectra of the **LBM** (15 μM) when treated with 10 equiv. of H<sub>2</sub>O<sub>2</sub> in PBS buffer solution (10 mM, pH = 7.4) and incubated for 45 minutes at room temperature.

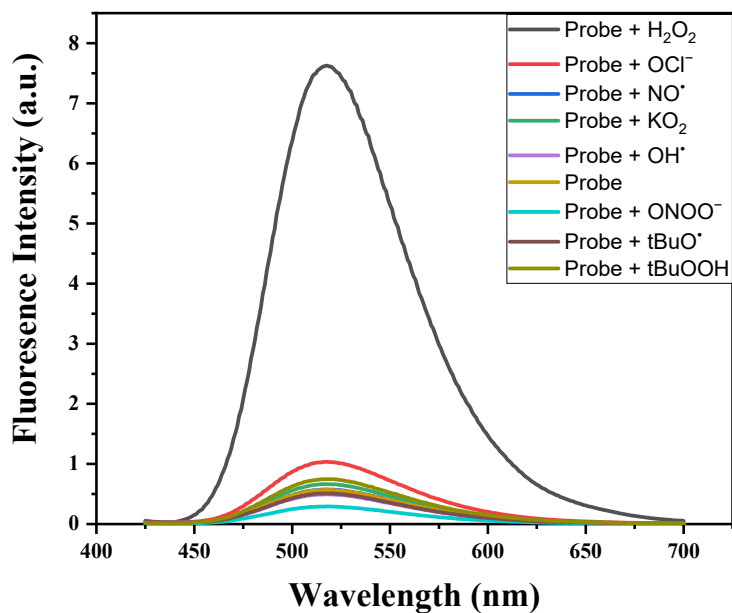

**Fig. S5b.** Fluorescence emission spectra of the **LBM** (15 μM) when treated with 10 equiv. of H<sub>2</sub>O<sub>2</sub> and other ROS in PBS buffer solution (10 mM, pH = 7.4) and incubated for 45 minutes at room temperature.



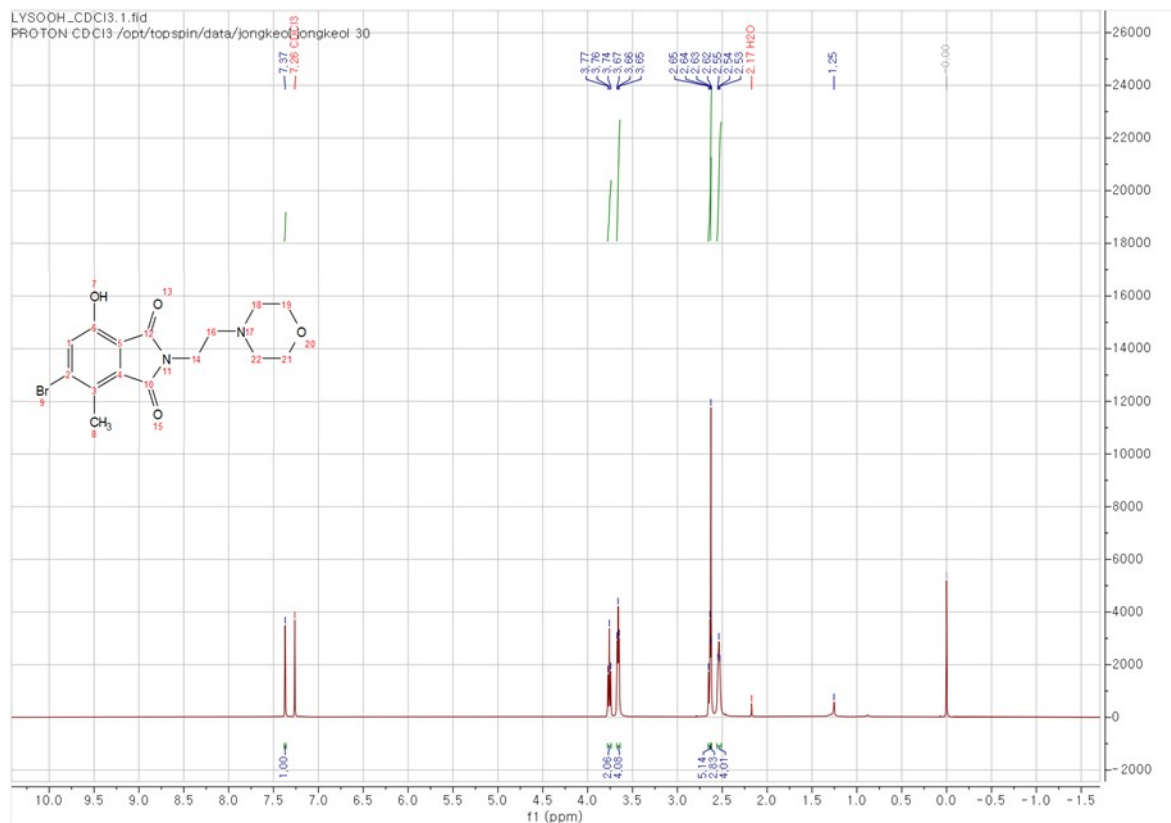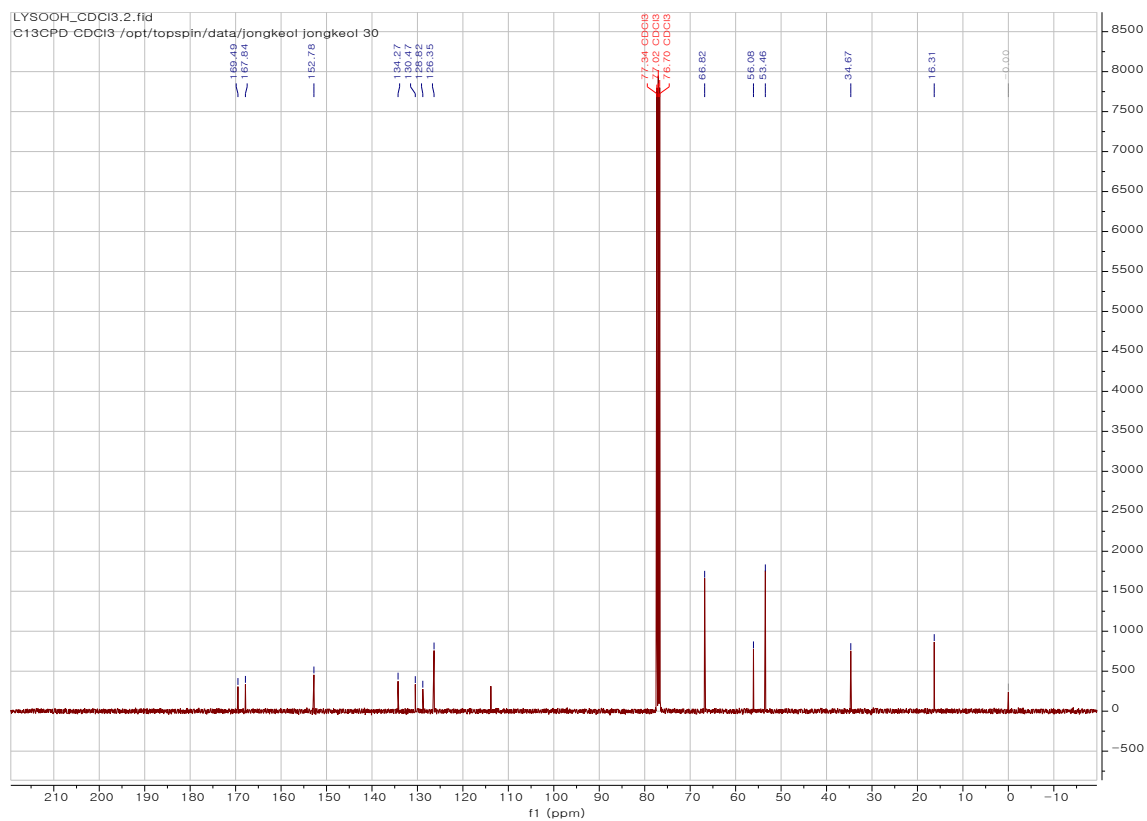

Fig S6. <sup>1</sup>H NMR (top) and <sup>13</sup>C NMR (bottom) spectra of LOH

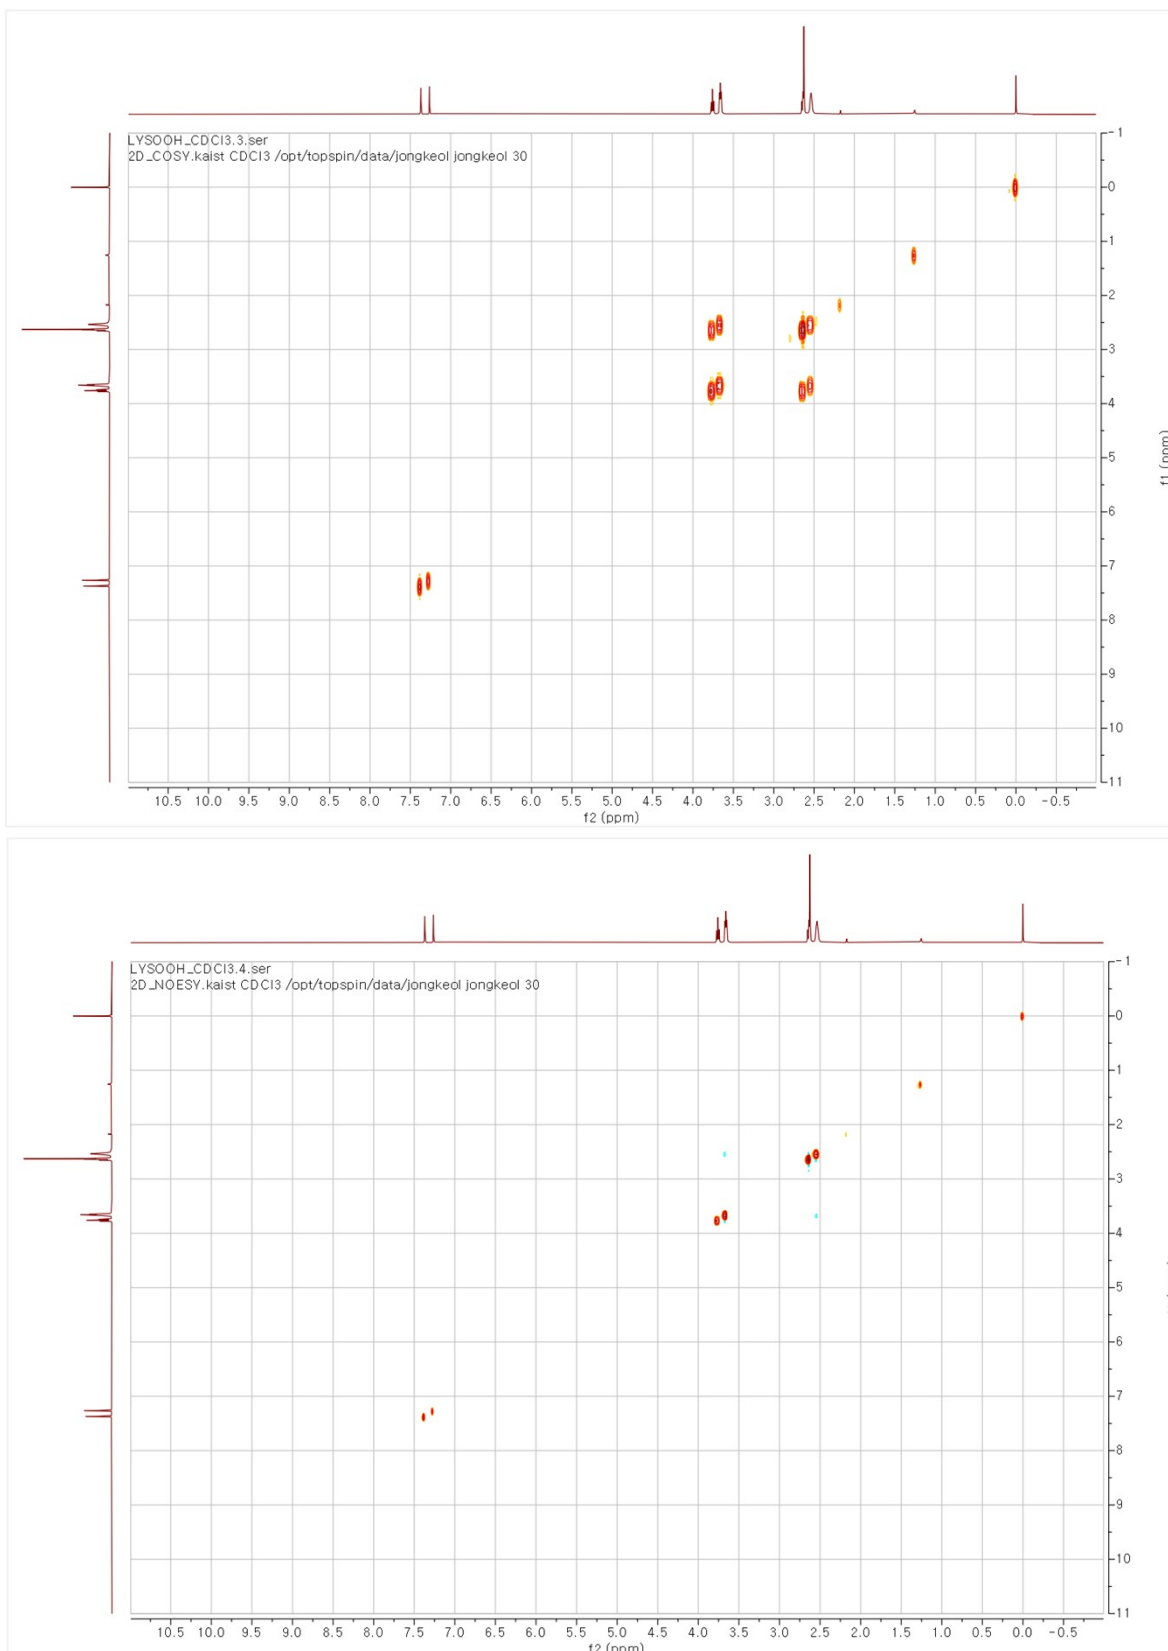

**Fig S7.**  $^1\text{H}$ - $^1\text{H}$  COSY (top) and  $^1\text{H}$ - $^1\text{H}$  NOESY (bottom) NMR spectra of **LOH**.

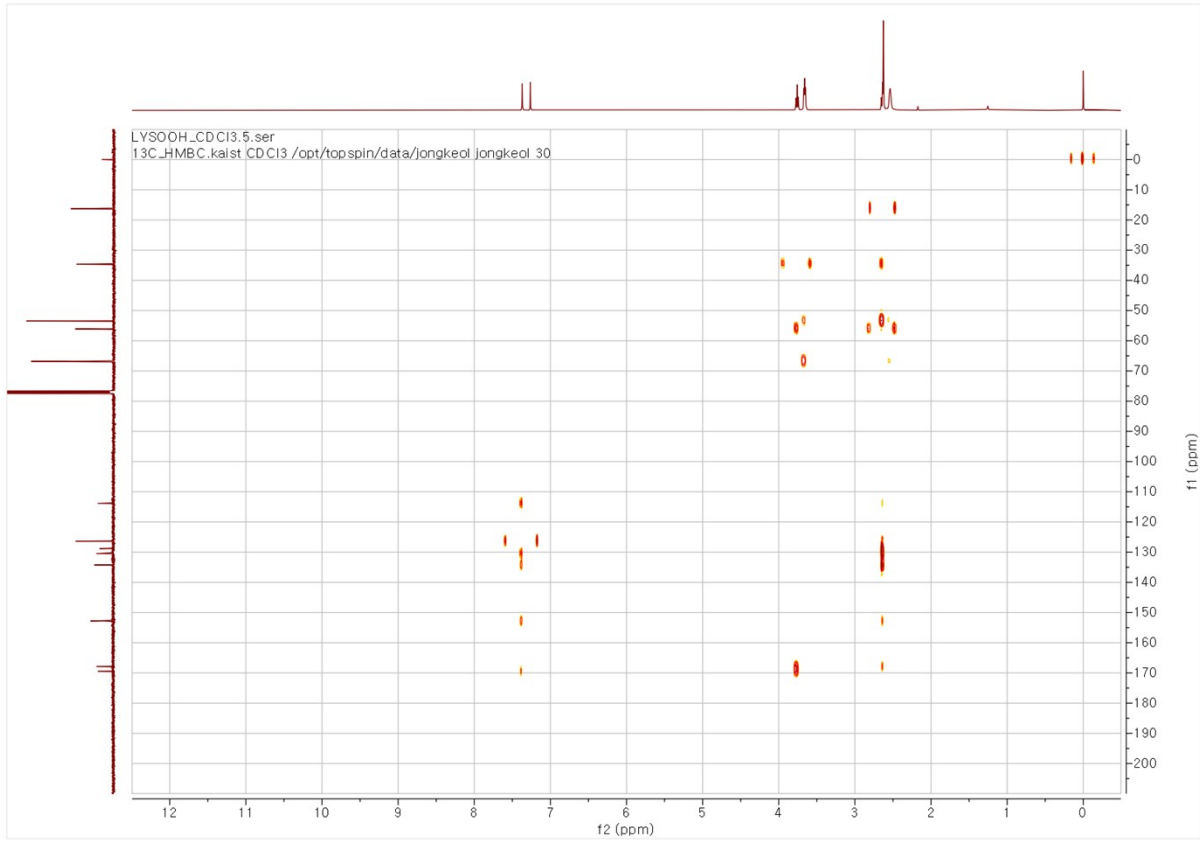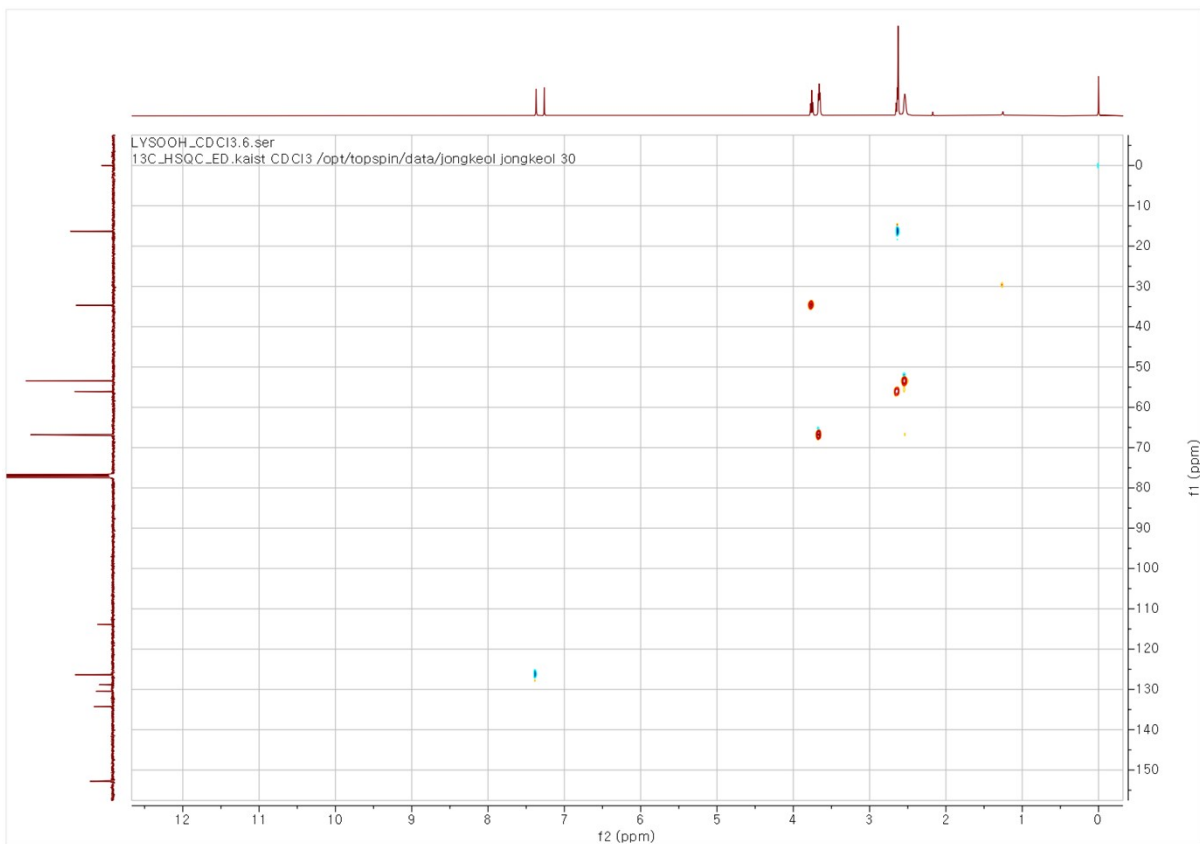

**Fig S8.**  $^1\text{H}$ - $^{13}\text{C}$  HMBC (top) and  $^1\text{H}$ - $^{13}\text{C}$  HSQC (bottom) NMR spectra **LOH**.

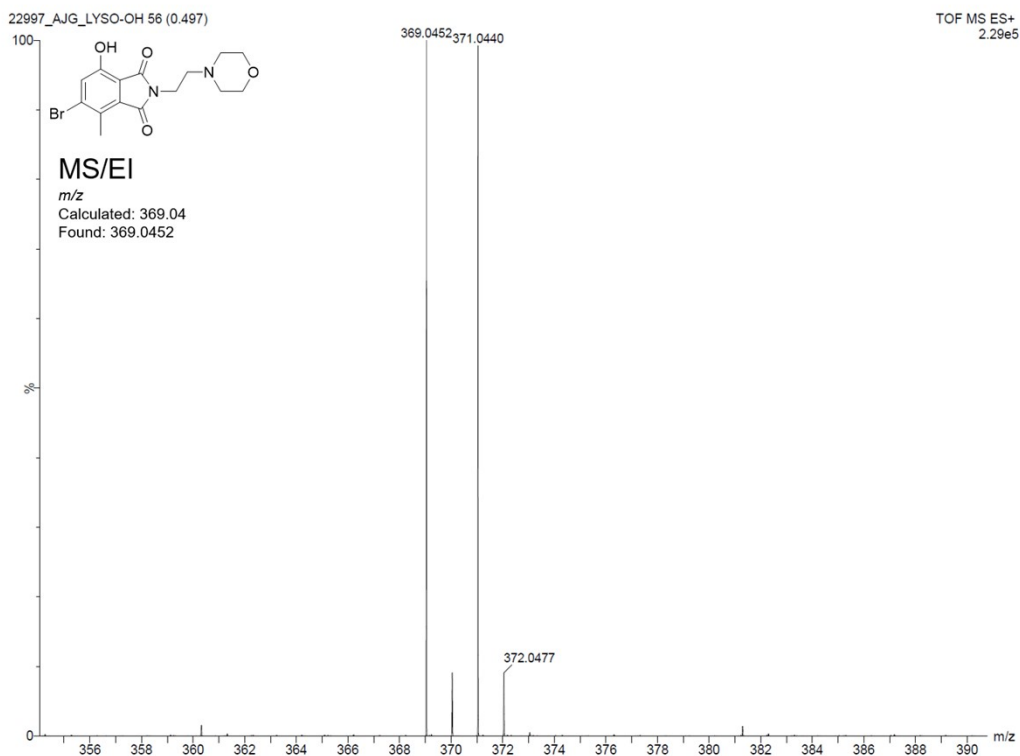

**Fig. S9.** HR-MS spectra of **LOH**.

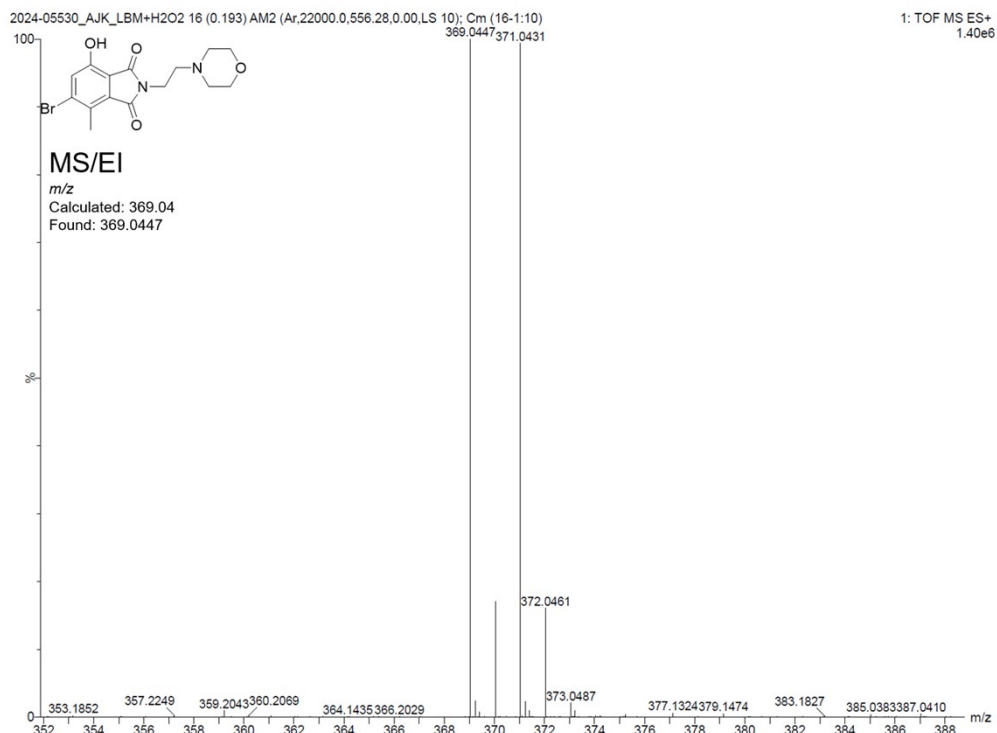

Fig. S10. HR-MS spectra of LBM + H<sub>2</sub>O<sub>2</sub>.

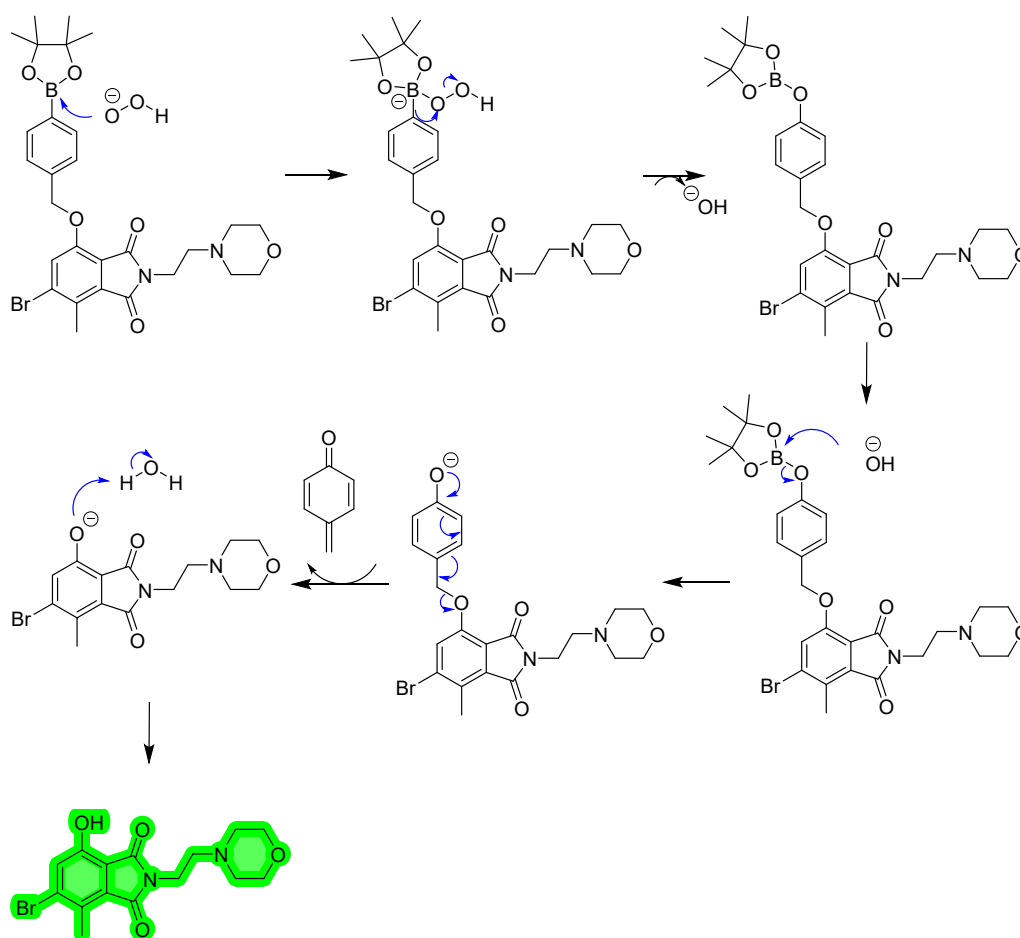

Fig. S11. Proposed sensing mechanism for the detection of H<sub>2</sub>O<sub>2</sub> by LBM.

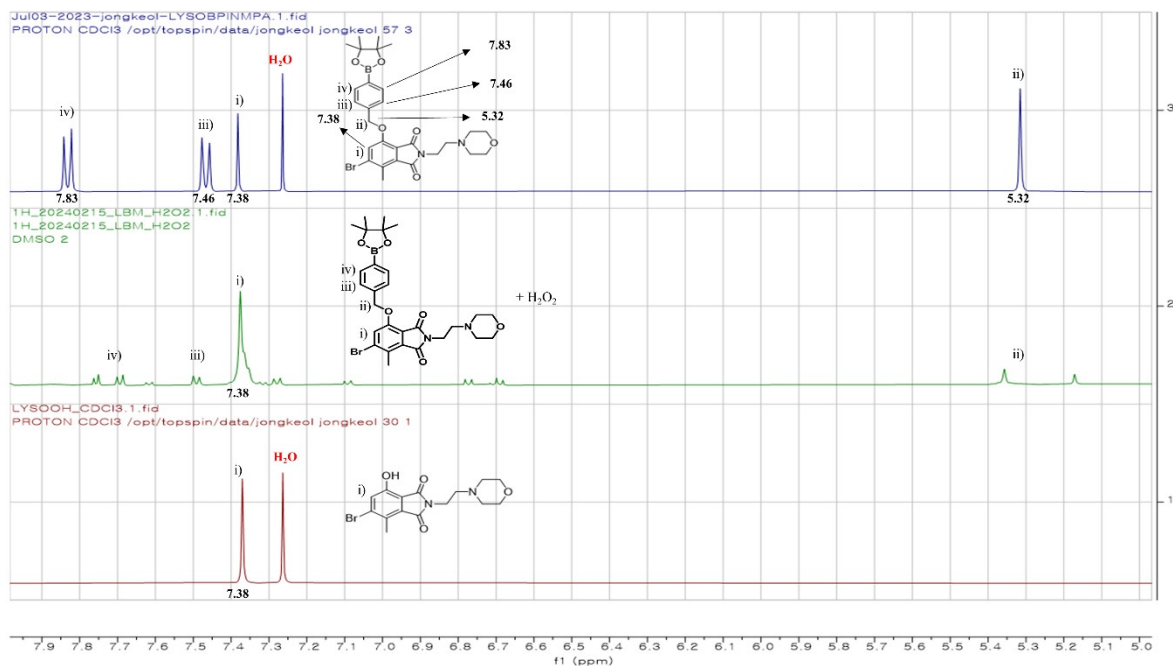

**Fig. S12.** Comparison of the  $^1\text{H}$  NMR spectra of a) **LBM**, b) reaction mixture containing **LBM** +  $\text{H}_2\text{O}_2$ , c) **LOH**

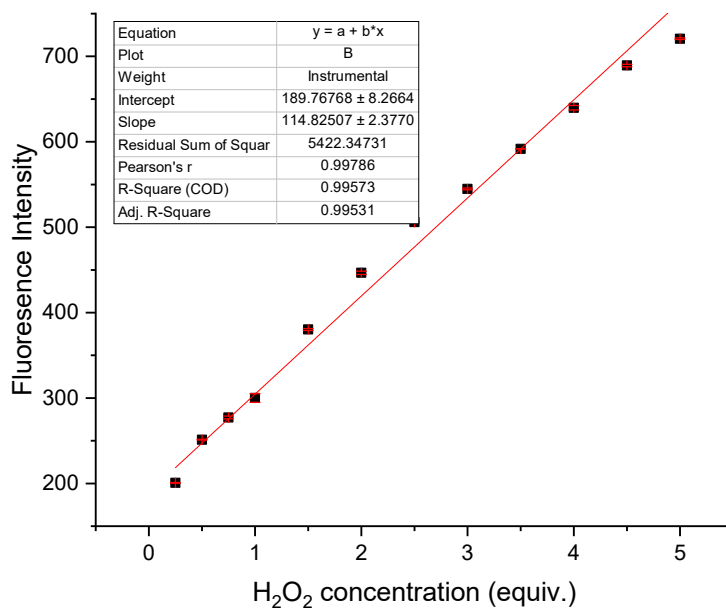

**Fig. S13.** Plot for the calculation of the limit of detection from the emission of **LBM** ( $15 \mu\text{M}$ ) in the solution of PBS (pH 7.4);  $\lambda_{\text{ex}}$ : 417 nm,  $\lambda_{\text{em}}$ : 517 nm; slit width 5.0 nm/5.0 nm. Error bars represent mean values  $\pm$  SD ( $n = 3$ ).

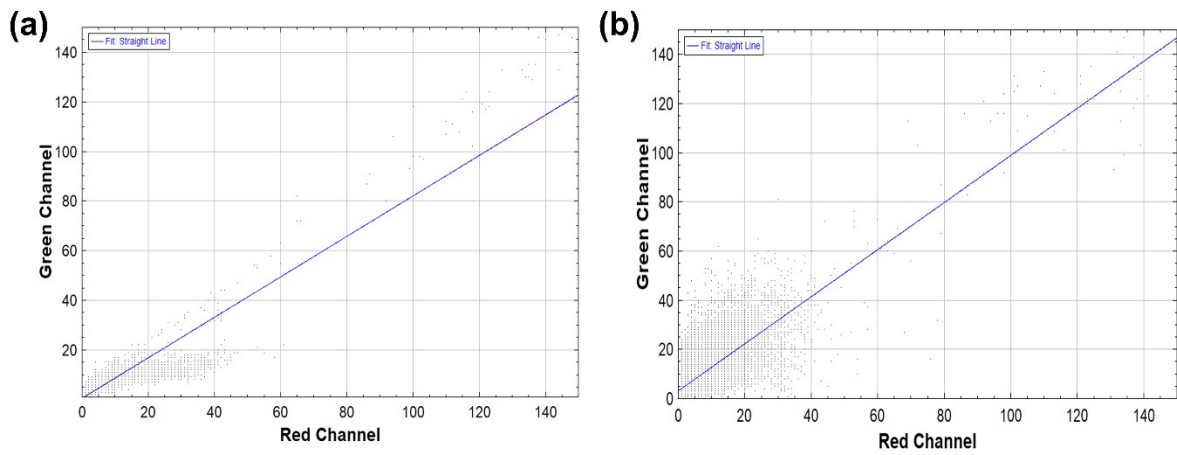

**Fig. S14.** Co-localization of Lyso-tracker Dye (Red Channel) and LBM (Green Channel) upon treatment of cells with **a)** PMA and **b)** H<sub>2</sub>O<sub>2</sub>.

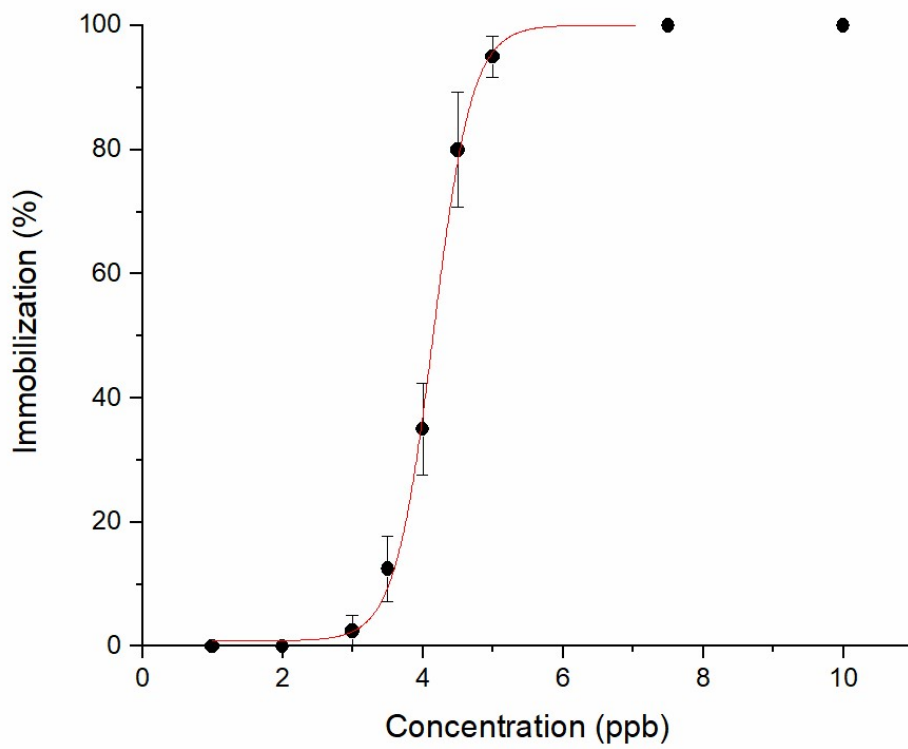

**Fig. S15.** Immobilization of daphnids after 48 h exposure to various concentrations of silver ion (1.0 to 10.0  $\mu\text{g L}^{-1}$ ). The graph is expressed as a mean value with SEM with 40 daphnids in a group.

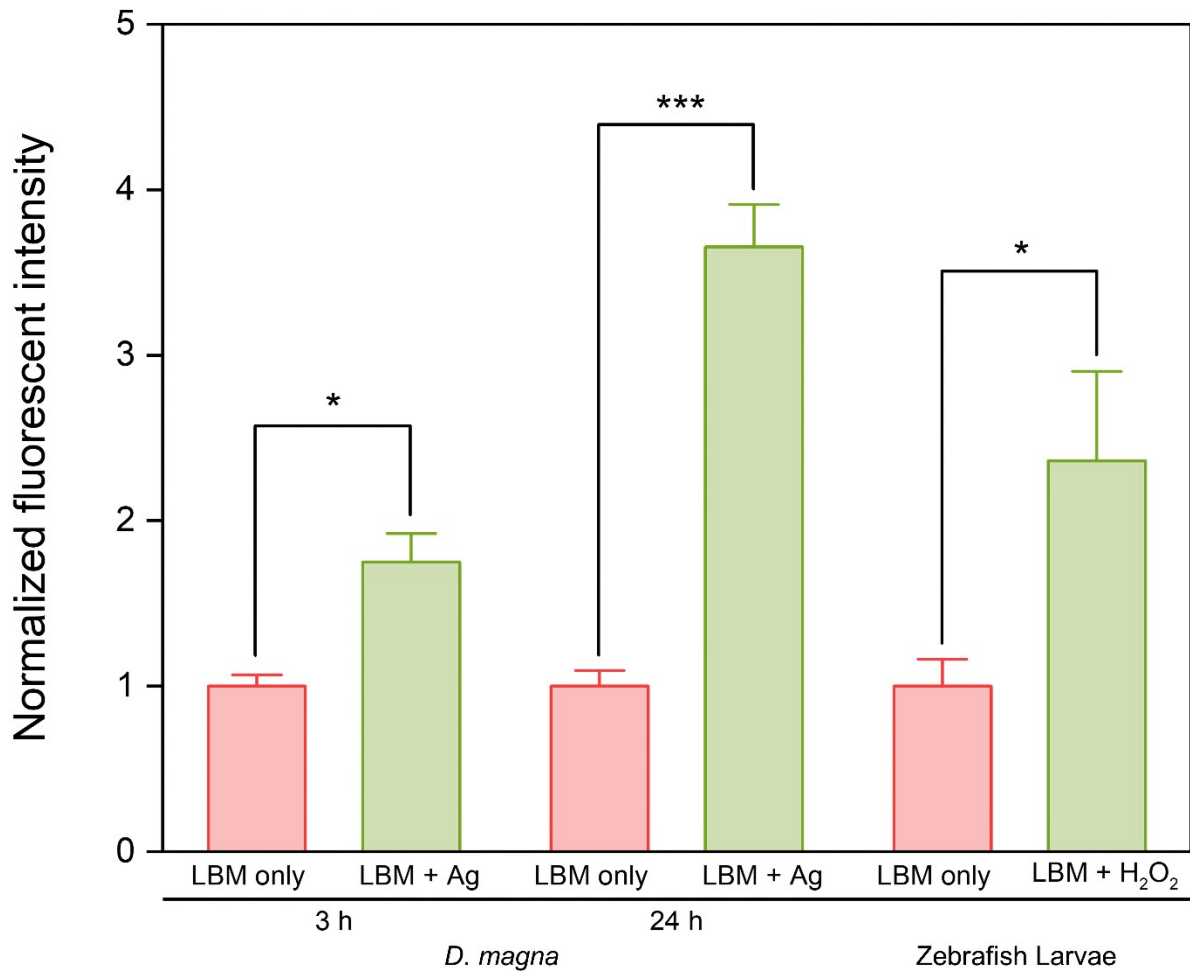

**Fig. S16.** Relative fluorescent intensities of *D. magna* between the group incubated with only 15.0  $\mu\text{M}$  LBM for 30 min at designated times and the group exposed to 3 ppb Ag for designated times, followed by incubation with 15.0  $\mu\text{M}$  LBM for 30 min. Relative fluorescent intensities of 96 hpf zebrafish larvae between the group incubated with only 15.0  $\mu\text{M}$  LBM for 30 min and the group exposed to 5 mM H<sub>2</sub>O<sub>2</sub> for 1 h, followed by incubation with 15.0  $\mu\text{M}$  LBM for 30 min. Statistical differences were analyzed by one-way analysis of variance (ANOVA) and Bonferroni multiple comparison tests. Error bars indicate standard error of the mean; \* and \*\*\* indicate  $p < 0.05$  and  $< 0.001$ , respectively.



| <b>Properites (Note: abbreviation same as website)</b> | <b>Value (LOH)</b> | <b>Value (LBM)</b> |
|--------------------------------------------------------|--------------------|--------------------|
| <b>miLogP</b>                                          | <b>1.64</b>        | <b>4.59</b>        |
| <b>TPSA</b>                                            | <b>71.78</b>       | <b>79.25</b>       |
| <b>natom</b>                                           | <b>22</b>          | <b>38</b>          |
| <b>MW</b>                                              | <b>369.21</b>      | <b>585.30</b>      |
| <b>nON</b>                                             | <b>6</b>           | <b>8</b>           |
| <b>nOHNH</b>                                           | <b>1</b>           | <b>0</b>           |
| <b>nviolations</b>                                     | <b>0</b>           | <b>1</b>           |
| <b>nrotb</b>                                           | <b>3</b>           | <b>7</b>           |
| <b>volume</b>                                          | <b>278.15</b>      | <b>511.75</b>      |

**Table. S2.** Information of the **LOH** and **LBM** calculated through ‘molinspiration’ property engine v2022.08’ at the website, <http://www.molinspiration.com>.

References:

1. F. Wu, H. Yu, Q. Wang, J. Zhang, Z. Li and X.-F. Yang, *Dyes Pigm.*, 2021, **190**, 109335.
2. H.-C. Zhang, D.-H. Tian, Y.-L. Zheng, F. Dai and B. Zhou, *Spectrochimica Acta Part A: Molecular and Biomolecular Spectroscopy*, 2021, **248**, 119264.
3. Y.-F. Wei, X. Wang, W.-J. Shi, R. Chen, L. Zheng, Z.-Z. Wang, K. Chen and L. Gao, *European Journal of Medicinal Chemistry*, 2021, **226**, 113828.
4. H. Han, X. He, M. Wu, Y. Huang, L. Zhao, L. Xu, P. Ma, Y. Sun, D. Song and X. Wang, *Talanta*, 2020, **217**, 121000.
5. L. Xu, Y. Zhang, L. Zhao, H. Han, S. Zhang, Y. Huang, X. Wang, D. Song, P. Ma, P. Ren and Y. Sun, *Talanta*, 2021, **233**, 122578.
6. Y. Wu, Z. Li and Y. Shen, *ACS Omega*, 2019, **4**, 16242-16246.
